# Supplementary material for: Spatio-Temporal Multiscale Analysis of Western Diet-Fed Mice Reveals a Translationally Relevant Sequence of Events during NAFLD Progression
Source: MDPI journal article supplement (doi:10.3390/cells10102516), 2021-09-23
Supplement: s1 [file s1]

Supplemental Table S1. Patient characteristics.

| Patient | Fibrosis stage | Gender | Age [years] |
|---------|----------------|--------|-------------|
| 1       | F0             | male   | 54          |
| 2       |                | male   | 50          |
| 3       |                | male   | 43          |
| 4       |                | male   | 46          |
| 5       |                | female | 43          |
| 6       |                | male   | 32          |
| 7       |                | female | 30          |
| 8       | F1             | female | 49          |
| 9       |                | female | 44          |
| 10      |                | female | 45          |
| 11      |                | female | 19          |
| 12      |                | male   | 35          |
| 13      |                | male   | 41          |
| 14      |                | female | 48          |
| 15      |                | male   | 54          |
| 16      |                | male   | 52          |
| 17      |                | male   | 68          |
| 18      | F2             | female | 27          |
| 19      |                | female | 34          |
| 20      |                | male   | 41          |
| 21      |                | male   | 49          |
| 22      |                | male   | 59          |
| 23      |                | female | 65          |
| 24      |                | female | 40          |
| 25      | F3             | male   | 41          |
| 26      |                | male   | 67          |
| 27      |                | male   | 64          |
| 28      |                | male   | 61          |
| 29      |                | male   | 56          |
| 30      |                | female | 69          |
| 31      |                | male   | 56          |
| 32      |                | female | 59          |
| 33      |                | male   | 56          |
| 34      | F4             | male   | 44          |
| 35      |                | female | 49          |
| 36      |                | male   | 40          |
| 37      |                | male   | 57          |
| 38      |                | female | 68          |
| 39      |                | male   | 52          |
